# Supplementary material
Source: publisher site journal article supplement (https://www.dovepress.com/article/384726)
Supplement: Supplementary file 1 [file get_supplementary_file.php]

**Supplemental Table 1 Comparison of volumes of basal ganglia regions between control and PSCI group**

| **The volume of grey matter** | Control group | PSCI group | p value |
| --- | --- | --- | --- |
| Right_Amygdala | 1849.49±179.84 | 1810.28±201.60 | 0.469 |
| Right_Caudate | 3472.42±376.69 | 3517.29±415.91 | 0.689 |
| Right_Putamen | 5342.68±477.34 | 5127.63±778.75 | 0.253 |
| Right_Pallidum | 1424.17±196.25 | 1482.31±323.56 | 0.454 |
| Left_Amygdala | 1820.57±211.61 | 1730.82±194.94 | 0.119 |
| Left_Caudate | 3453.56±351.61 | 3869.43±975.70 | 0.062 |
| Left_Putamen | 5456.19±603.15 | 5497.92±703.47 | 0.822 |
| Left_Pallidum | 1297.41±257.29 | 1327.79±279.72 | 0.689 |
